# Supplementary material for: On the photophysical properties of Al-, Ga- and In-hemin complexes: a quantum chemical investigation
Source: Royal Society of Chemistry journal article supplement (doi:10.1039/d5cp03186a), 2025-01-01
Supplement: d5cp03186a1.pdf [file d5cp03186a1.pdf]

Supplementary Data

**On the photodynamic properties of Al, Ga and In hemin complexes . A quantum chemical investigation.**

Maciej Spiegel <sup>[a]</sup>, Nino Russo <sup>\*[b]</sup>

On the photophysical properties of Al, Ga and In hemin complexes. A quantum chemical investigation.

Maciej Spiegel <sup>[a]</sup>, Nino Russo <sup>\*[b]</sup>

<sup>[a]</sup> M. Spiegel

Department of Organic Chemistry and Pharmaceutical Technology, Wrocław

Medical University, Borowska 211 A, 50-556 Wrocław, Poland

<sup>[b]</sup> N. Russo

Dipartimento di Chimica e Tecnologie Chimiche, Università della Calabria, I-

87136 Rende (CS), Italy

Supplementary Data

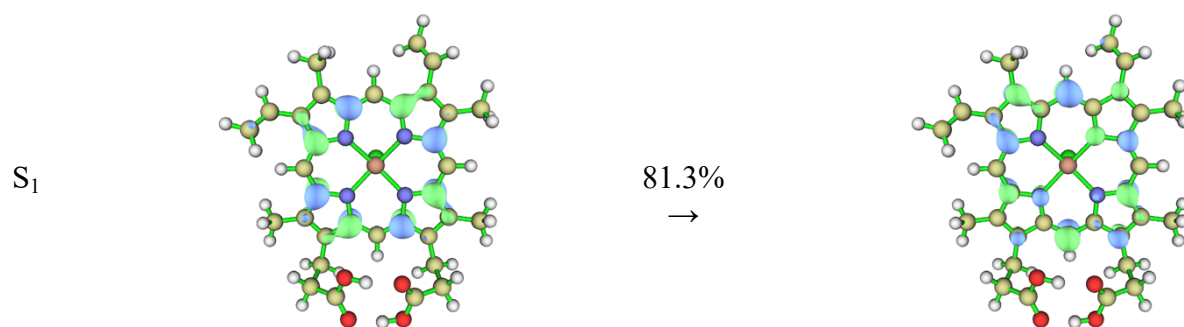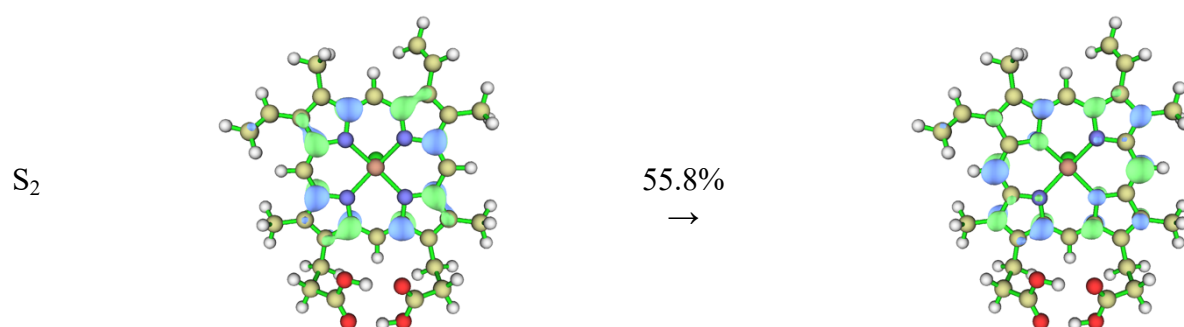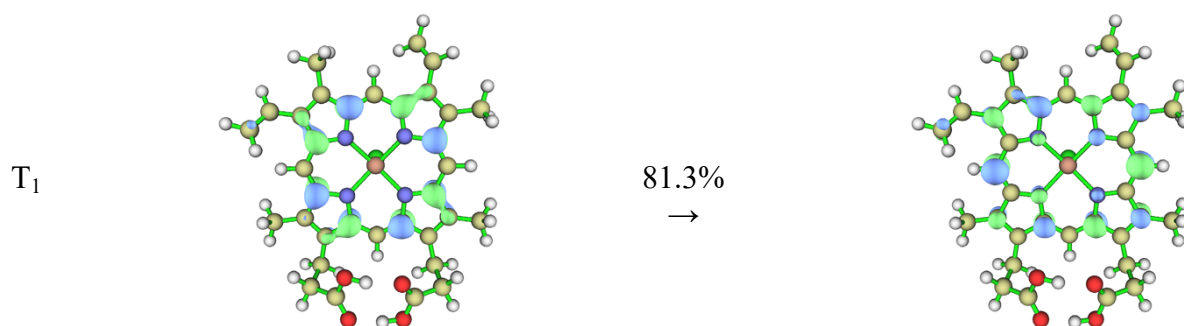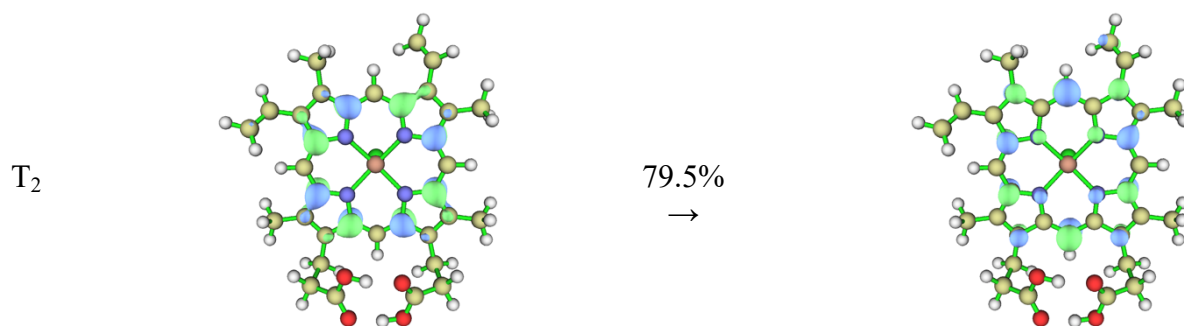

$T_3$

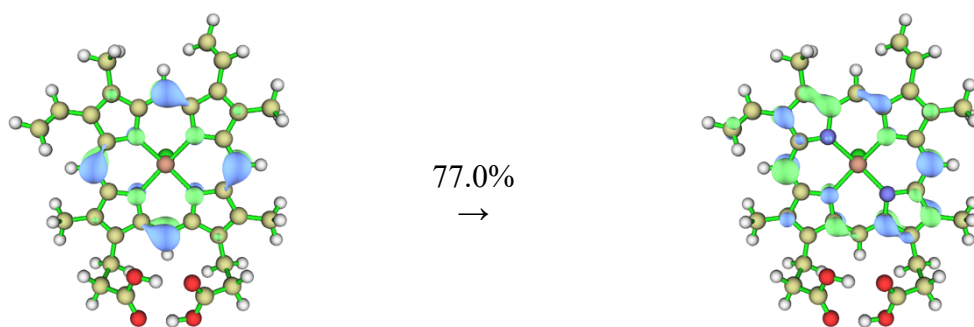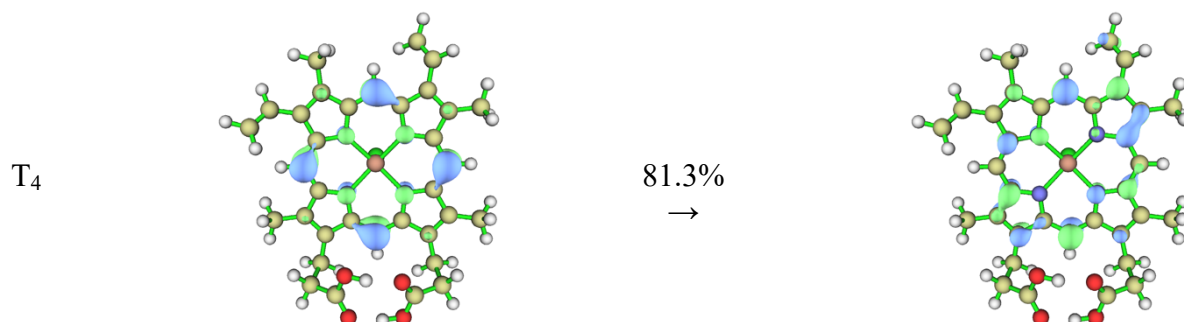

**Figure S1.** Natural transition orbitals of the relevant excitations of Al-Hemin. (isoval= 0.05)

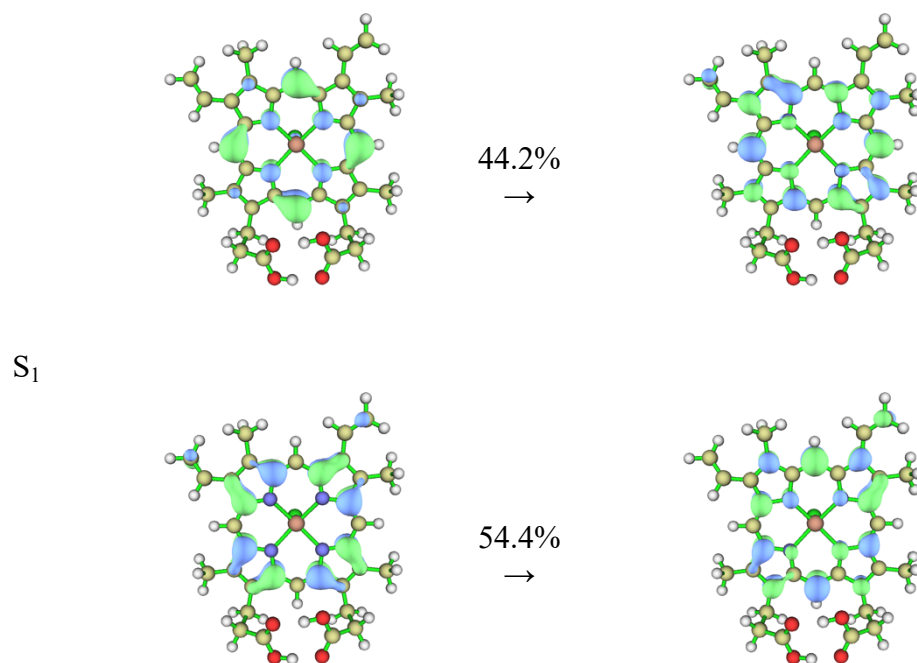

---

S<sub>2</sub>

## Supplementary Data

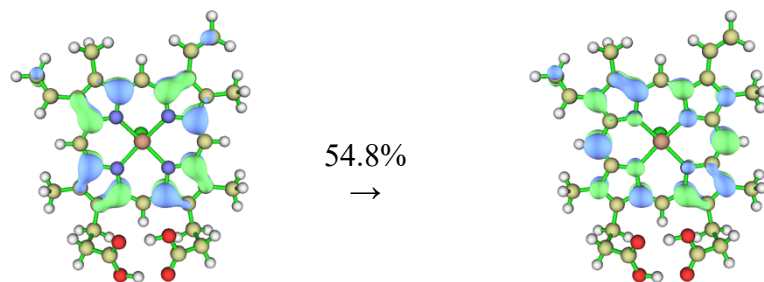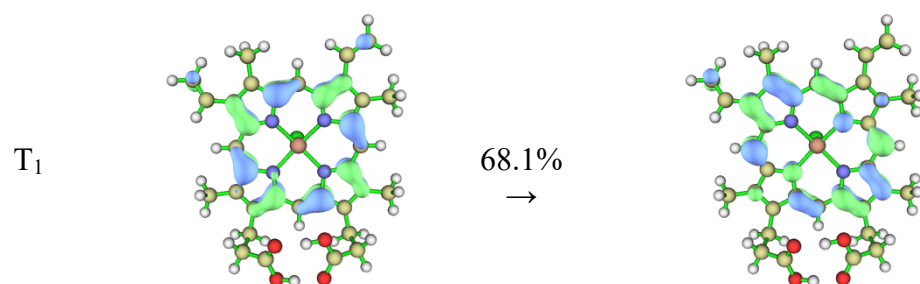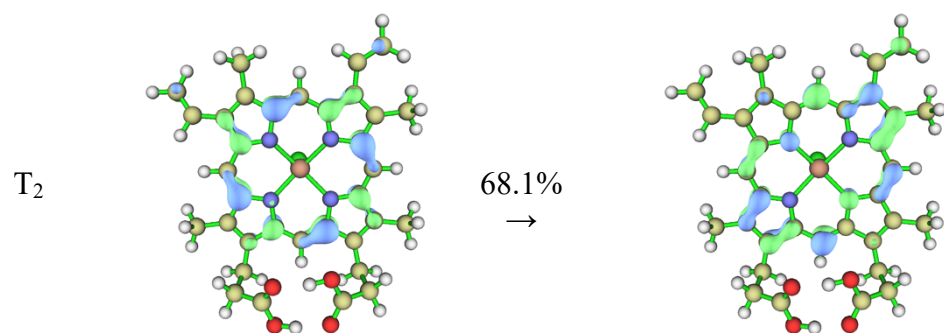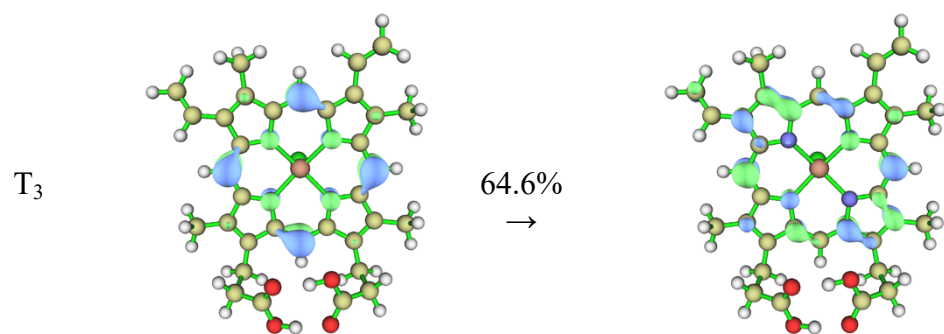

---

T<sub>4</sub>

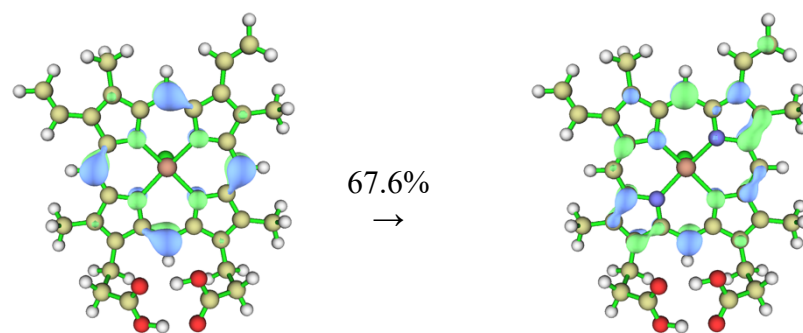

**Figure S2.** Natural transition orbitals of the relevant excitations of Ga-Hemin. (isoval= 0.05)

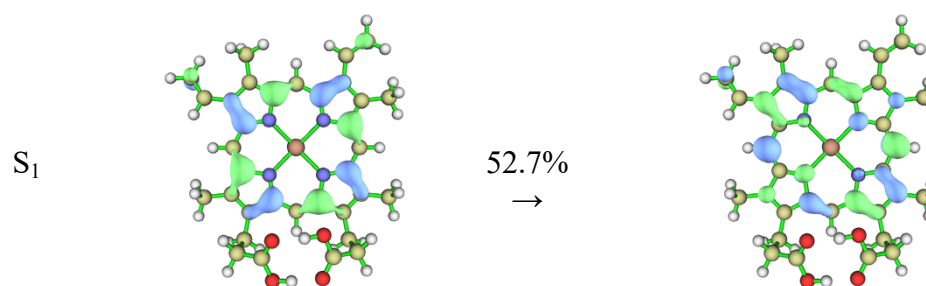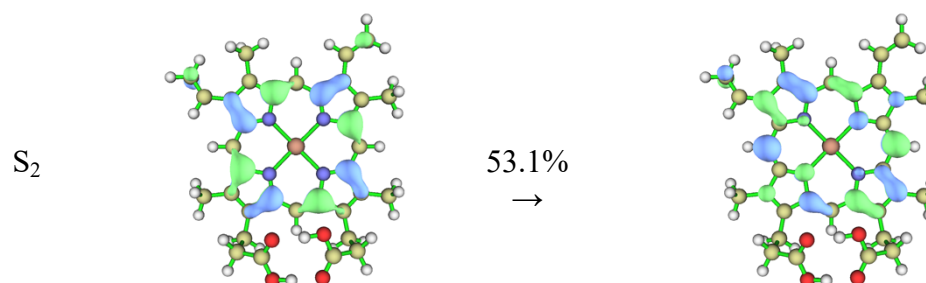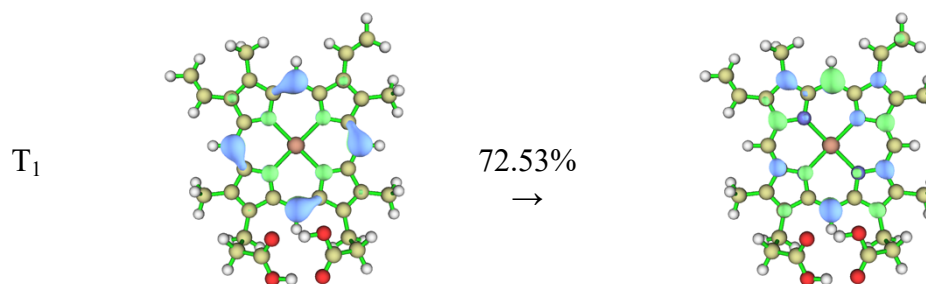

---

$T_2$

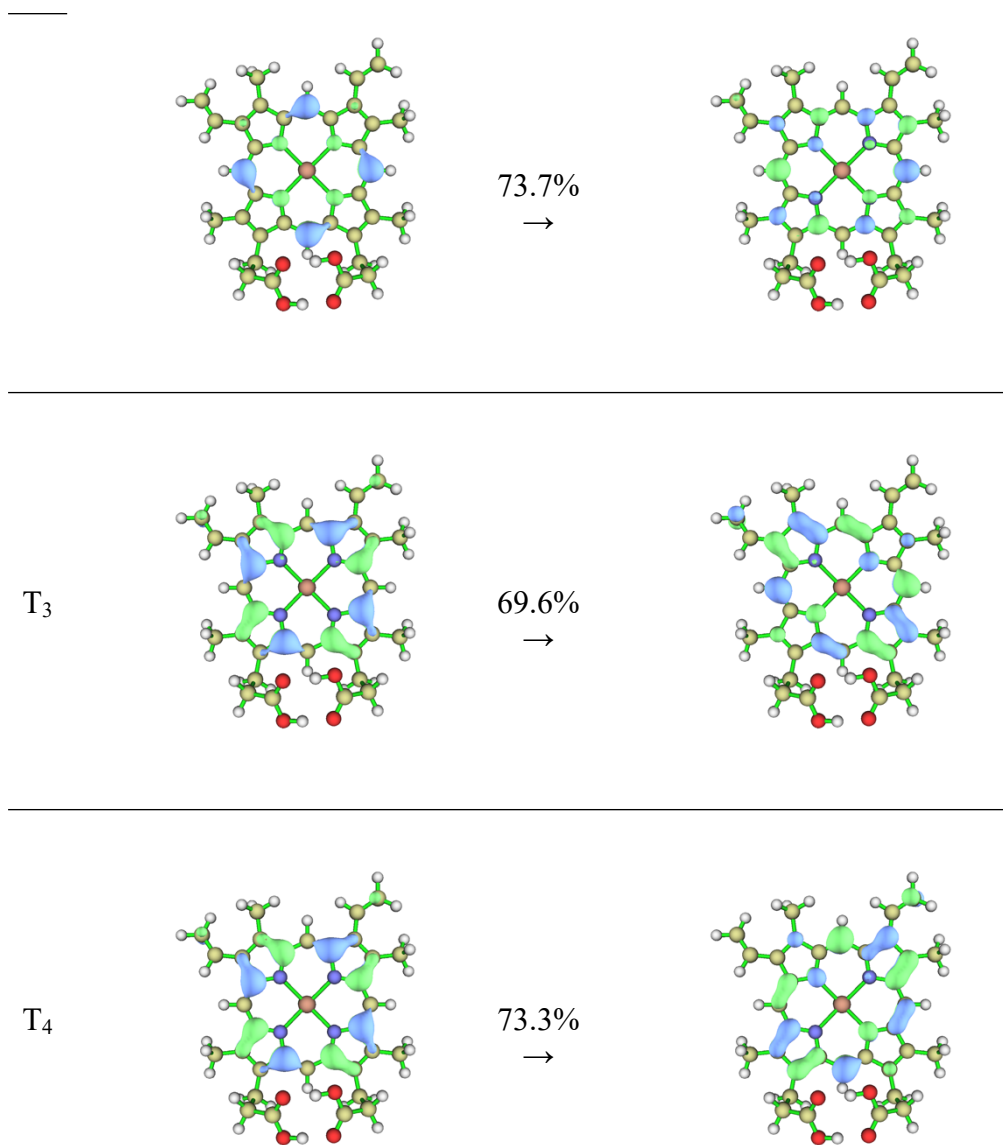

**Figure S3.** Natural transition orbitals of the relevant excitations of In-Hemin. (isoval= 0.05)
